# Supplementary material for: Thermodynamic study of CsCaCl3 using neutron diffraction
Source: Royal Society of Chemistry journal article supplement (doi:10.1039/d4tc00592a), 2024-01-01
Supplement: d4tc00592a1.pdf [file d4tc00592a1.pdf]

# Pressure and Temperature Phase Diagram of CsCaCl<sub>3</sub>

## SUPPLEMENTARY INFORMATION

Craig L Bull,<sup>a,b</sup> Christopher J Ridley,<sup>a</sup> Nicholas Funnell,<sup>a</sup> Sumit Komar,<sup>b</sup> and James Cumby<sup>b</sup>

<sup>a</sup> ISIS Facility, Rutherford Appleton Laboratory, Harwell Science and Innovation Campus,  
Didcot, OX11 0QX, UK

<sup>b</sup> EastCHEM School of Chemistry, Joseph Black Building, David Brewster Road, Edinburgh, EH9 3FJ, UK

\*To whom correspondence should be addressed;

E-mail: craig.bull@stfc.ac.uk

**Submitted to J Mat Chem C**

**Table S1:** Derived structural parameters for a perovskite in both cubic ( $P\bar{3}m$ ) and tetragonal ( $I4/mcm$ ) symmetry, where ( $\tan(\phi) = 4u$ ) and  $u$  is the displacement of the  $x$  and  $y$  co-ordinate of the Cl atom in the tetragonal phase (after K. S. Knight *et al*, Physics and Chemistry of Minerals 41, 461 (2014))

| Structural Parameter   | $Pm\bar{3}m$         | $I4/mcm$                                                                                        |
|------------------------|----------------------|-------------------------------------------------------------------------------------------------|
| A-X(1)                 | $\frac{a}{\sqrt{2}}$ | $\frac{a}{2}$                                                                                   |
| A-X(2)                 | -                    | $\frac{1}{4} [2a^2 (1 - 2\phi + \phi^2 - \frac{2}{3}\phi^3) + c^2]^{0.5}$                       |
| A-X(2)                 | -                    | $\frac{1}{4} [2a^2 (1 + 2\phi + \phi^2 + \frac{2}{3}\phi^3) + c^2]^{0.5}$                       |
| B-X(1)                 | $\frac{a}{2}$        | $\frac{c}{4}$                                                                                   |
| B-X(2)                 | -                    | $\frac{a}{2\sqrt{2}} [1 + \frac{1}{2}\phi^2 + \frac{5}{24}\phi^4]$                              |
| AX <sub>n</sub> volume | $\frac{5a^3}{6}$     | $\frac{a^2c}{24} [3 - \phi - \frac{1}{3}\phi^2 - \frac{2}{15}\phi^5 - \frac{17}{315}\phi^7]$    |
| BX <sub>6</sub> volume | $\frac{a^3}{6}$      | $\frac{a^2c}{24} [1 + \phi^2 + \frac{2}{3}\phi^4 + \frac{17}{45}\phi^6 + \frac{62}{315}\phi^8]$ |

$$l_{pc}(T) = l_{pc0} + \frac{A_{pc}}{\exp\left(\frac{B_{pc}}{T}\right) - 1}$$

Einstein internal energy model fitted to the pseudo-cubic lattice parameter  $l_{pc}$  with temperature ( $T$ ) using an Einstein temperature ( $B_{pc}$ ). For these models we find  $a_{pc0}=5.3650 \text{ \AA}$ ,  $A_{pc}=0.0466 \text{ \AA}$ ,  $B_{pc}=129.5 \text{ K}$  and  $c_{pc0}=5.3981 \text{ \AA}$ ,  $A_{c_{pc}}=-0.0431 \text{ \AA}$ ,  $B_{c_{pc}}=140.7 \text{ K}$ .

$$e_a = (2e_1 + e_3)$$

$$e_{tz} = \frac{2}{\sqrt{3}}(e_3 - e_1)$$

$$e_1 = \frac{a/\sqrt{2} - a_0}{a_0}$$

$$e_3 = \frac{c/2 - a_0}{a_0}$$

Equations for the symmetry-adapted tetragonal strain,  $e_{tz}$ , volumetric strain,  $e_a$ , and natural linear strain components  $e_1$  and  $e_3$ .  $a_0$  is calculated from the pseudo cubic unit-cell volume of the tetragonal phase ( $\sqrt{[3]a_{pc}^2c_{pc}}$ ) at each temperature. As  $e_1 < 0$ ,  $e_3 > 0$  and  $e_3 \simeq 2|e_1|$ , by definition  $e_a = 0$  and  $e_{tz} > 0$ .

$$\cos(\alpha_{pc}) - \cos(\alpha_{pc})_{calc} = \left(\frac{2}{3}\right) \zeta \left[1 - \left(\frac{2}{3}\right) \sin^2\omega\right]^{-1}$$

$$\cos(\alpha_{pc})_{calc} = \frac{\sin^2\omega}{3 - 2\sin^2\omega}$$

Formulation for the octahedral strain  $\zeta$  (equal to 0 in the undistorted, cubic phase).  $\omega$  is the octahedral tilt angle in the rhombohedral phase.

$$V(T) = V_0 + \frac{9N\gamma_1 k_B z T}{B_0} \left(\frac{T}{\Theta_{D1}}\right)^3 \int_0^{\frac{\Theta_{D1}}{T}} \frac{x^3 dx}{e^x - 1} + \frac{9N\gamma_2 k_B (1-z) T}{B_0} \left(\frac{T}{\Theta_{D2}}\right)^3 \int_0^{\frac{\Theta_{D2}}{T}} \frac{x^3 dx}{e^x - 1}$$

$$c_V(T) = 9Nk_B z \left(\frac{T}{\Theta_{D1}}\right)^3 \int_0^{\frac{\Theta_{D1}}{T}} \frac{x^4 e^x dx}{(e^x - 1)^2} + 9Nk_B (1-z) \left(\frac{T}{\Theta_{D2}}\right)^3 \int_0^{\frac{\Theta_{D2}}{T}} \frac{x^4 e^x dx}{(e^x - 1)^2}$$

Formulation of unit-cell volume and isochoric heat capacity as a function of temperature according to the two-term Debye approximation.  $V_0$  is the unit-cell volume at zero temperature,  $N$  is the number of atoms,  $\gamma_n$  are the Grüneisen parameters,  $k_B$  is the Boltzmann constant,  $B_0$  is the isothermal bulk modulus,  $z$  is the mixing coefficient for the two-term model, and  $\theta_{Dn}$  are the Debye temperatures. In the present study the fitting was performed using the GlobalAnalysis package in IgorPro (©WaveMetrics), allowing for the global minimisation of both integrals against two physical datasets with shared fitting parameters.

$$M_i = \left(\frac{R_i N_i}{B}\right) \exp\left[\left(\frac{R_0 - R_i}{B}\right)\right]$$

Formulation of  $M_i$ , the total estimated variation of bond valence in a polyhedral site due to the change of average bond distance.  $R_i$  is the average measured bond distance in the polyhedra,  $N_i$  is the coordination number in the polyhedra,  $R_0$  is a constant for a particular atom pair and  $B$  is a universal constant (0.37), the values of which are given and defined in the work of Brown and Altermatt (Acta Cryst. B41, 244-247 (1985)) The relative values of  $M$  for the A site ( $M_A$ ) and ( $M_B$ ) give an indication of the relative compressibilities (full derivation and description is given in Zhao *et al* Acta Cryst B 60, 3, 263-272 (2004). For  $M_A/M_B \geq 1$  the material will become more symmetric upon compression,  $M_A/M_B \approx 1$  the distortion does not change with pressure and  $M_A/M_B \leq 1$  indicates that the distortion will increase with increasing pressure.

**Table S2:** Determined structural parameters of CsCaCl<sub>3</sub> with temperature. For the tetragonal structure the space-group is  $I4/mcm$ , Cs  $4b$ , Ca  $4c$ , Cl(1)  $4a$ , Cl(2)  $8h \frac{1}{4}+u, \frac{3}{4}+u, 0$ . For  $Pm\bar{3}m$ ; Wyckoff positions: Cs  $1b$ , Ca  $1a$ , Cl  $3d$  For further details see main text

| Temperature (K) | Phase      | a(Å)      | c(Å)        | V(Å <sup>3</sup> ) | u       |
|-----------------|------------|-----------|-------------|--------------------|---------|
| 5               | Tetragonal | 7.7880(3) | 10.7952(5)  | 621.57(7)          | 0.0233  |
| 25              | Tetragonal | 7.5864(3) | 10.7968(5)  | 621.40(7)          | 0.02387 |
| 45              | Tetragonal | 7.5920(3) | 10.7923(5)  | 622.06(7)          | 0.02197 |
| 65              | Tetragonal | 7.5970(3) | 10.7846(6)  | 622.42(7)          | 0.0193  |
| 70              | Tetragonal | 7.6998(3) | 10.7825(6)  | 622.77(6)          | 0.01777 |
| 80              | Tetragonal | 7.6033(4) | 10.7787(8)  | 623.12(6)          | 0.01595 |
| 90              | Tetragonal | 7.6079(6) | 10.7732(10) | 623.56(6)          | 0.01323 |
| 100             | Cubic      | 5.3836(2) | -           | 156.030(14)        | -       |
| 120             | Cubic      | 5.3848(2) | -           | 156.138(15)        | -       |
| 140             | Cubic      | 5.3869(2) | -           | 156.323(17)        | -       |
| 160             | Cubic      | 5.3888(2) | -           | 156.49(2)          | -       |
| 180             | Cubic      | 5.3902(2) | -           | 156.61(2)          | -       |
| 200             | Cubic      | 5.3923(3) | -           | 156.79(2)          | -       |
| 220             | Cubic      | 5.3941(3) | -           | 156.95(3)          | -       |
| 240             | Cubic      | 5.3962(3) | -           | 157.13(3)          | -       |
| 260             | Cubic      | 5.3991(3) | -           | 157.38(3)          | -       |
| 280             | Cubic      | 5.4004(3) | -           | 157.50(3)          | -       |

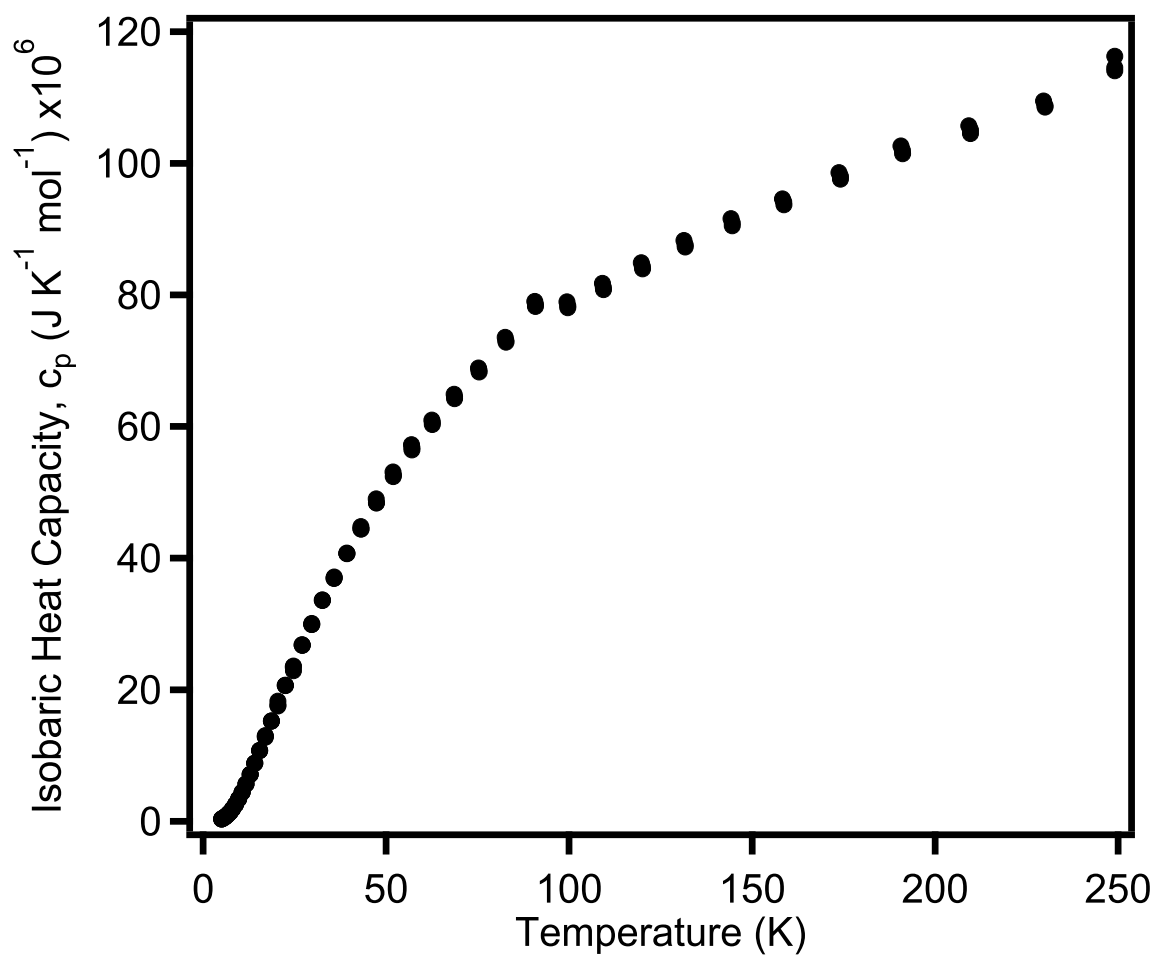

**Figure S1:** Isobaric heat capacity as a function of temperature, collected on warming from 4 K. There is a clear discontinuity at the expected transition temperature between 90 and 100 K.
